# Supplementary material
Source: Frontiers journal article supplement (https://www.frontiersin.org/articles/503495)
Supplement: Table_1.xlsx [file Table_1.xlsx]

## Sheet: Foglio1
Supplementary Table 1: Fusarium -specific database to be used in the “custom database search” module of MZmine.
ID	PubChem ID/CID	Chemical Name	Formula [M]	M-H	M+H	Group	Subgroup	Reference
5	4	1-amino-2-propanol	C3H9NO	74.0611	76.0757	Alcols		Campos-Bermudez, 2013
331	43	Hydroxyglutaric acid	C5H8O5	147.029	149.044	Organic Acid		Paranidharan 2008
317	72	Protocatechuic acid	C7H6O4	153.018	155.034	Not Flavonoids	Benzoic acid derivatives	Atanasova-Penichon 2016
344	179	3-hydroxy-2-butanone	C4H8O2	87.0452	89.0597	Others		Cruz, 2012; Miroslava Cuperlovic-Culf, 2016
502	199	agmatine	C5H14N4	129.115	131.129			MWFD Database
52	240	Benzaldehyde	C7H6O	105.033	107.049	Aromatic hydrocarbon		Paranidharan 2008
257	243	benzoic acid	C7H6O2	121.029	123.044	FP not flavonoids	Phenolic Acid and derivatives	Hamzehzarghani, 2008
2	264	butyric acid	C4H8O2	87.0452	89.0597	Acids		Campos-Bermudez, 2013
365	273	cadaverine	C5H14N2	101.108	103.123	polyamines		Campos-Bermudez, 2013
321	311	citric acid	C6H8O7	191.02	193.034	Organic acid		Bollina, 2010
226	323	coumarin	C9H6O2	145.03	147.044	FP not flavonoids	Coumarin	Gauthier 2015
54	338	salicylic acid	C7H6O3	137.024	139.039	Benzoic acid derivatives		Gunnaiah, 2012
594	370	Gallic acid	C7H6O5	169.014	171.029			MWFD Database
462	441	3-hydroxybutyric acid	C4H8O3	103.04	105.055			MWFD Database
23	469	2-Aminoadipic acid	C6H11NO4	160.062	162.076	Aminoacids and derivatives		Paranidharan 2008; Bollina 2010
335	487	Methylmalonic Acid	C4H6O4	117.019	119.034	Organic Acid		Hamzehzarghani, 2005
4	525	malic acid	C4H6O5	133.014	135.029	Acids		Campos-Bermudez, 2013
333	525	Malic Acid	C4H6O5	133.014	135.029	Organic Acid		Hamzehzarghani, 2005
569	674	dimethylamine	C2H7N	44.0506	46.0651			MWFD Database
26	750	Glycine	C2H5NO2	74.0247	76.0393	Aminoacids and derivatives		Paranidharan 2008
330	752	Glyceric Acid	C3H6O4	105.018	107.034	Organic Acid		Hamzehzarghani, 2005
93	753	Glycerol	C3H8O3	91.0401	93.0546	Fatty acids and conjugates		Gauthier 2005
603	754	Glycerophosphoric acid	C3H9O6P	171.006	173.021			MWFD Database
604	760	glyoxylic acid	C2H2O3	72.9931	75.0077			MWFD Database
611	802	indole-3-acetic acid	C10H9NO2	174.056	176.071			MWFD Database
616	811	Itaconic acid	C5H6O4	129.019	131.034			MWFD Database
571	847	DL-Methionine sulfoxide	C5H11NO3S	164.039	166.053			MWFD Database
700	849	piperidine-2-carboxylic acid	C6H11NO2	128.072	130.086			MWFD Database
334	867	malonic acid	C3H4O4	103.004	105.018	Organic Acid		Bollina 2010
8	892	myo-inositol	C6H12O6	179.056	181.071	Alcols		Hamzehzarghani, 2012
653	931	naphthalene	C10H8	127.055	129.07			MWFD Database
153	932	Naringenin	C15H12O5	271.061	273.076	FP Flavonoids	Flavanone	Gauthier, 2015
107	985	palmitic acid	C16H32O2	255.233	257.248	Fatty acids and conjugates		Hamzehzarghi, 2005
672	991	parathion	C10H14NO5PS	290.026	292.04			MWFD Database
271	999	Phenylacetic acid	C8H8O2	135.045	137.06	FP not flavonoids	Phenolic Acid and derivatives	Gauthier 2015
692	1004	Phosphoric acid	H3O4P	96.9696	98.9842			MWFD Database
337	1032	Propanoic Acid	C3H6O2	73.0284	75.0441	Organic Acid		Hamzehzarghani, 2005
366	1045	putrescine	C4H12N2	87.0928	89.1073	polyamines		Campos-Bermudez, 2013, Gauthier, 2015
288	1057	pyrogallol	C6H6O3	125.024	127.039	FP not flavonoids	Phenolic Alcohol	Gauthier 2015
338	1060	Pyruvic acid	C3H4O3	87.0088	89.0233	Organic Acid		Bollina 2010
368	1103	spermine	C10H26N4	201.208	203.223	polyamines		Paranidharan 2008
340	1110	succinic acid	C4H6O4	117.019	119.034	Organic Acid		Hamzehzarghani, 2005; Parandiharan 2008
19	1150	Tryptamine	C10H12N2	159.093	161.107	Alkaloids		Pasquet, 2014
461	1662	3-Hydroxy-3-methylglutaric acid	C6H10O5	161.046	163.06			MWFD Database
484	1826	5-Hydroxyindole-3-acetic acid	C10H9NO3	190.051	192.066			MWFD Database
250	2102	2-Propenoic aci	C10H7NO3	188.035	190.05	FP not flavonoids	Phenolic Acid and derivatives	Gauthier 2015
86	2266	azelaic acid	C9H16O4	187.098	189.112	Fatty acids and conjugates		Cuperlovic-Culf, 2016; D’Maris, 2012
522	2519	caffeine	C8H10N4O2	193.073	195.088			MWFD Database
87	2969	Capric acid	C10H20O2	171.139	173.154	Fatty acids and conjugates		Bollina, 2010
586	3301	ethylenediamine	C2H8N2	59.0615	61.076			MWFD Database
588	3314	eugenol	C10H12O2	163.076	165.091			MWFD Database
580	3449	Epigalanthamin	C17H21NO3	286.145	288.159			MWFD Database
487	3830	6-Furfurylaminopurine	C10H9N5O	214.073	216.088			MWFD Database
98	3893	lauric acid	C12H24O2	199.17	201.185	Fatty acids and conjugates		Bollina, 2010
640	4133	methyl salicylate	C8H8O3	151.04	153.055			MWFD Database
648	4402	N6-Cyclopentyladenosine	C15H21N5O4	334.152	336.167			MWFD Database
659	4484	nicotinic acid mononucleotide	C11H14NO9P	334.033	336.048			MWFD Database
649	4664	NA	C21H29N10O14P3S	769.073	771.087			MWFD Database
370	4692	parthenolide	C15H20O3	247.134	249.149	Sesquiterpene lactone
707	4883	practolol	C14H22N2O3	265.156	267.17			MWFD Database
712	4992	pyrilamine	C17H23N3O	284.177	286.191			MWFD Database
726	5192	sebacic acid	C10H18O4	201.113	203.128			MWFD Database
728	5202	serotonin	C10H12N2O	175.088	177.102			MWFD Database
110	5281	stearic acid	C18H36O2	283.264	285.279	Fatty acids and conjugates		Hamzehzarghani, 2012
9	5780	Sorbitol	C6H14O6	181.072	183.086	Alcols		Campos-Bermudez, 2013
425	5911	1,1-Dimethyl-4-phenylpiperazinium iodide	C12H19IN2	317.052	319.067			MWFD Database
31	5950	L-alanine	C3H7NO2	88.0404	90.055	Aminoacids and derivatives		Paranidharan 2008
44	5951	L-Serine	C3H7NO3	128.035	130.05	Aminoacids and derivatives		Paranidharan 2008
34	5960	L-aspartic acid	C4H7NO4	132.03	134.045	Aminoacids and derivatives		Paranidharan 2008; Bollina 2010
35	5961	L-glutamine	C5H10N2O3	145.062	147.076	Aminoacids and derivatives		Paranidharan 2008
550	5984	D(-)-Fructose	C6H12O6	179.056	181.071			MWFD Database
377	5988	D-Sucrose	C12H22O11	341.109	343.123	Sugars
376	6036	D-Galactose	C6H12O6	179.056	181.071	Sugars
49	6057	Tyrosine	C9H11NO3	180.067	182.081	Aminoacids and derivatives
24	6115	Aniline	C6H7N	92.0506	94.0651	Aminoacids and derivatives
38	6137	L-methionine	C5H11NO2S	148.044	150.058	Aminoacids and derivatives		Paranidharan 2008; Bollina 2011
41	6140	L-phenylalanine	C9H11NO2	164.072	166.086	Aminoacids and derivatives		Paranidharan 2008;
7	6251	D-mannitol	C6H14O6	181.072	183.086	Alcols		Campos-Bermudez, 2013
40	6262	L-ornithine	C5H12N2O2	131.083	133.097	Aminoacids and derivatives		Paranidharan 2008
33	6267	L-asparagine	C4H8N2O3	131.046	133.061	Aminoacids and derivatives		Paranidharan 2008
36	6274	L-histidine	C6H9N3O2	154.062	156.077	Aminoacids and derivatives		Paranidharan 2008
48	6288	Threonine	C4H9NO3	118.051	120.066	Aminoacids and derivatives		Paranidharan 2008
45	6305	L-tryptophan	C11H12N2O2	203.083	205.097	Aminoacids and derivatives		Paranidharan 2008
37	6306	L-isoleucine	C6H13NO2	130.087	132.102	Aminoacids and derivatives		Bollina 2011
32	6322	L-arginine	C6H14N4O2	173.104	175.119	Aminoacids and derivatives		Bollina, 2010
585	6325	Ethylene	C2H4	27.024	29.0386			MWFD Database
601	6466	Gibberellic acid	C19H22O6	345.134	347.149			MWFD Database
357	6508	quinic acid	C7H12O6	191.056	193.071	phenylpropanoid		Bollina, 2010
451	6560	2-Methyl-1-propanol	C4H10O	73.0659	75.0804			MWFD Database
501	6581	Acrylic acid	C3H4O2	71.0139	73.0284			MWFD Database
573	6613	D-pantothenic acid	C9H17NO5	218.103	220.118			MWFD Database
606	6802	guanosine	C10H13N5O5	282.084	284.099			MWFD Database
358	7113	cis-p-coumaroylagmatine	C14H20N4O2	275.151	277.166	polyamines	hydroxycinnamic acid amides	Gauthier, 2015
642	7150	Methylbenzoate	C8H8O2	135.045	137.06			MWFD Database
584	7229	Ethylac	C12H14N2S3	281.025	283.039			MWFD Database
446	7311	2,4-Di-tert-butylphenol	C14H22O	205.16	207.174			MWFD Database
43	7405	L-Pyroglutamic acid	C5H7NO3	128.035	130.05	Aminoacids and derivatives		Bollina 2010
382	7427	trehalose	C12H22O11	341.109	343.123	Sugars
637	7456	Methyl 4-hydroxybenzoate	C8H8O3	151.04	153.055			MWFD Database
471	7469	4'-Hydroxyacetophenone	C8H8O2	135.045	137.06			MWFD Database
256	7478	anisic acid	C8H8O3	151.04	153.055	FP not flavonoids	Phenolic Acid and derivatives	Gauthier 2015
658	7670	N-ETHYLANILINE	C8H11N	120.082	122.096			MWFD Database
450	7720	2-Ethylhexan-1-ol	C8H18O	129.128	131.143			MWFD Database
547	7966	Cyclohexanol	C6H12O	99.0815	101.096			MWFD Database
566	8020	Dimethoxymethane	C3H8O2	75.0452	77.0597			MWFD Database
21	8037	1,2-Ethanediamine,N,N,N,N’tetramethyl	C6H16N2	115.123	117.139	Amines		Hamzehzarghani, 2008
609	8103	Hexyl alcohol	C6H14O	101.097	103.112			MWFD Database
113	8180	Undecanoic acid	C11H22O2	185.155	187.169	Fatty acids and conjugates		Gauthier 2005; Bollina, 2010
742	8317	Violanthrone	C34H16O2	455.108	457.122			MWFD Database
223	8468	Vanillic acid	C8H8O4	167.035	169.05	FP not flavonoids	Benzoic acid derivative	Atanasova-Penichon 2016
740	8629	UDP-glucose	C15H24N2O17P2	565.048	567.062			MWFD Database
343	8742	shikimic acid	C7H10O5	173.046	175.06	Organic acis
548	8882	CYCLOPENTENE #	C5H8	67.0553	69.0699			MWFD Database
439	8914	1-Nonanol	C9H20O	143.144	145.159			MWFD Database
708	8955	pregnenolone	C21H32O2	315.233	317.248			MWFD Database
137	9064	Cianidanol	C15H14O6	289.072	291.086	FP Flavonoids	Flavanol	Gauthier, 2015
538	9560	Cis-Mevinphos	C7H13O6P	223.038	225.052			MWFD Database
473	9958	4-methylcatechol	C7H8O2	123.045	125.06			MWFD Database
184	10185	dihydroquercetin	C15H12O7	303.051	305.066	FP Flavonoids	Flavonol	Gauthier, 2015
336	10264	Pentonic Acid	C5H10O6	165.039	167.055	Organic Acid		Hamzehzarghani, 2005
535	10286	Chromone	C9H6O2	145.03	147.044			MWFD Database
332	10430	Isovaleric Acid	C5H10O2	101.06	103.075	Organic Acid		Hamzehzarghani, 2005
94	10465	Heptadecanoic acid	C17H34O2	269.249	271.263	Fatty acids and conjugates		Gauthier 2005
102	10467	n-Eicosanoic acid	C20H40O2	311.296	313.31	Fatty acids and conjugates		Paranidharan 2008
570	10479	Dimethylcadmium	C2H6Cd	142.943	144.958			MWFD Database
731	10514	Strychnidin-10-one	C22H24N2O3	363.171	365.186			MWFD Database
633	10521	Malachite Green Carbinol base	C23H26N2O	345.197	347.212			MWFD Database
704	10607	podophyllotoxin	C22H22O8	413.124	415.139			MWFD Database
541	10675	Cloperidone	C21H23ClN4O2	397.144	399.158			MWFD Database
328	10690	gluconic acid	C6H12O7	195.051	197.066	Organic Acid		Bollina, 2010
318	10742	Syringic acid	C9H10O5	197.046	199.06	Not flavonoids	Benzoic acid derivatives	Atanasova-Penichon 2016
518	10869	Benzyl methyl ether	C8H10O	121.066	123.08			MWFD Database
460	10932	3-Aminobutanoic acid	C4H9NO2	102.056	104.071			MWFD Database
646	10947	Muscone	C16H30O	237.222	239.237			MWFD Database
100	11005	Myristic acid	C14H28O2	227.202	229.216	Fatty acids and conjugates		Paranidharan 2008
559	11395	Di-beta-naphthyldiimide;	C20H14N2	281.108	283.123			MWFD Database
734	11448	tert-Butyl methacrylate	C8H14O2	141.092	143.107			MWFD Database
463	11898	3-methyl-4-nitroaniline	C7H8N2O2	151.051	153.066			MWFD Database
709	11982	Propyl 2-furoate	C8H10O3	153.056	155.07			MWFD Database
440	12020	1-penten-3-ol	C5H10O	85.0659	87.0804			MWFD Database
567	12215	dimethyl but-2-enedioate	C6H8O4	143.035	145.05			MWFD Database
112	12530	Tridecanoic acid	C13H26O2	213.186	215.201	Fatty acids and conjugates		Paranidharan 2008
481	13059	5-Fluoro-beta-methyltryptamine hydrochloride	C11H14ClFN2	227.076	229.09			MWFD Database
608	13577	Hex-2-en-1-ol	C6H12O	99.0815	101.096			MWFD Database
635	14152	m-DL-Sarcolysin	C13H18Cl2N2O2	303.067	305.082			MWFD Database
574	14259	Eicosanoic acid	C21H42O2	325.311	327.326			MWFD Database
266	14541	Methyl cinnamic acid	C10H10O2	161.061	163.075	FP not flavonoids	Phenolic Acid and derivatives
50	14925	Tricarballylic acid	C6H8O6	175.025	177.039	Amminoacids and derivatives		Hamzehzarghani, 2012
641	15608	Methyl tridecanoate	C14H28O2	227.202	229.216			MWFD Database
457	16251	3,4-dimethoxyphenol	C8H10O3	153.056	155.07			MWFD Database
472	17295	4-Methyl-6-phenyl-1,3,5-triazine-2-ol	C10H9N3O	186.067	188.082			MWFD Database
434	28557	18-Crown-6 ether	C12H24O6	263.15	265.165			MWFD Database
46	30819	O-phospho-L-tyrosine	C9H12NO6P	260.032	262.048	Aminoacids and derivatives		Gunnaiah, 2014
583	31251	Ethyl nonanoate	C11H22O2	185.155	187.169			MWFD Database
433	31260	18-Crown-6	C5H12O	87.0815	89.0961			MWFD Database
693	31404	Phosphotyrosine	C15H24O	219.175	221.19			MWFD Database
327	33037	Glucaric Acid	C6H10O8	209.03	211.045	Organic Acid		Parandiharan 2008
47	34756	S-adenosyl-L methionine	C15H23N6O5S	398.137	400.152	Aminoacids and derivatives		Gunnaiah, 2012
605	43344	Guanidine	C11H15N5	216.125	218.14			MWFD Database
561	47945	Dihydro-7-hydroxymyoporone	C15H24O4	267.16	269.175			MWFD Database
595	65084	Gallocatechin	C15H14O7	305.067	307.081			MWFD Database
39	65098	L-norvaline	C5H11NO2	116.072	118.086	Aminoacids and derivatives		Paranidharan 2008
176	68077	Tangeretin	C20H20O7	371.114	373.128	FP Flavonoids	Flavone	Gauthier, 2015
444	68482	2-(Benzoylamino)benzoic acid	C14H11NO3	240.067	242.081			MWFD Database
27	69221	glycine methyl ester	C3H7NO2	88.0404	90.055	Aminoacids and derivatives
613	69867	Indole-3-carboxylic acid	C9H7NO2	160.04	162.055			MWFD Database
11	70639	3-Methylxanthine	C6H6N4O2	165.042	167.056	Alkaloids		Bollina, 2010
577	72276	Epicatechin	C15H14O6	289.072	291.086			MWFD Database
140	72277	Epigallocatechin	C15H14O7	305.067	307.081	FP Flavonoids	Flavanol	Gauthier, 2015
503	72965	Ailanthone	C20H24O7	375.145	377.159			MWFD Database
699	73399	Pinoresinol	C20H22O6	357.134	359.149			MWFD Database
393	73432	Brusatol	C26H32O11	519.187	521.202	Terpenoids	Diterpene	Gauthier, 2015
84	75704	9-Oxononanoic acid	C9H16O3	171.103	173.117	Fatty acids and conjugates
22	75891	beta-Alanine	C4H9NO2	102.056	104.071	Aminoacids
507	79025	alpha-D-glucose	C6H12O6	179.056	181.071			MWFD Database
75	79075	2-Stearoylglycerol	C21H42O4	357.301	359.316	Fatty acids and conjugates		Paranidharan 2008
426	83064	1,2,3,5-tetra-O-Acetyl-beta-D-ribofuranose	C13H18O9	317.088	319.102			MWFD Database
402	84298	Asperuloside	C18H22O11	413.109	415.123	Terpenoids	Iridoids and derivatives	Gauthier, 2015
407	87691	Loganin	C17H26O10	389.145	391.16	Terpenoids	Iridoids and derivatives	Gauthier, 2015
598	88708	Gentiopicroside;	C16H20O9	355.103	357.118			MWFD Database
53	90231	methyl p-ethoxybenzoate	C10H12O3	179.071	181.086	Aromatic hydrocarbon		Paranidharan 2008
403	91458	Aucubin	C15H22O9	345.119	347.134	Terpenoids	Iridoids and derivatives	Gauthier, 2015
489	91493	6-phosphogluconic acid	C6H13O10P	275.017	277.032			MWFD Database
157	92794	Prunin	C21H22O10	433.114	435.129	FP Flavonoids	Flavanone	Gauthier, 2015; Bollina 2010
636	92817	Melezitose	C18H32O16	503.162	505.176			MWFD Database
72	92836	2-Hydroxyhexadecanoic acid	C16H32O3	271.228	273.242	Fatty acids and conjugates		Cuperlovic-Culf, 2016; Gunnaiah, PhD Gauthier 2005
504	92891	Albizziin	C4H9N3O3	146.057	148.072			MWFD Database
28	92904	Indole-3-lactic acid	C11H11NO3	204.067	206.081	Aminoacids and derivatives
6	94154	Arabitol	C5H12O5	151.061	153.076	Alcols		Campos-Bermudez, 2013
374	94253	Vulgarin	C15H20O4	263.129	265.143	Sesquiterpenoids
379	95259	L-xylose	C5H10O5	149.046	151.06	Sugars
725	96118	Scutellarein tetramethyl ether	C19H18O6	341.103	343.118			MWFD Database
589	97214	Eupatorin	C18H16O7	343.082	345.097			MWFD Database
208	97332	Quercetin pentamethyl ether	C20H20O7	371.114	373.128	FP Flavonoids	Flavonol	Gauthier, 2015;
534	99486	Cholesterol Myristate	C41H72O2	595.546	597.561			MWFD Database
703	99535	Podolide	C19H22O5	329.139	331.154			MWFD Database
690	99748	Phenylacetaldoxime	C8H9NO	134.061	136.076			MWFD Database
563	107126	Dihydrojasmonic acid	C12H20O3	211.134	213.149			MWFD Database
241	119205	Matairesinol	C20H22O6	357.134	359.149	FP not flavonoids	Lignan and stilbene	Gauthier 2015
414	120678	Quinovic acid	C30H46O5	485.327	487.342	Terpenoids	Triterpene	Gauthier, 2015
730	121947	shikimate-3-phosphate	C7H11O8P	253.012	255.026			MWFD Database
469	122667	4-Demethylpodophyllotoxin	C21H20O8	399.109	401.123			MWFD Database
69	123409	2- Monopalmitin	C19H38O4	329.269	331.284	Fatty acids and conjugates		Paranidharan 2008
384	124021	beta-Glucogallin	C13H16O10	331.067	333.082	Tannin		Bollina 2010
476	128708	4-Phenyl-6-O-malonylglucoside	C15H18O9	341.088	343.102			MWFD Database
326	128869	Galactonic acid	C6H12O7	195.051	197.066	Organic Acid		Paranidharan 2008
517	131248	Benzyl beta-primeveroside	C18H26O10	401.145	403.16			MWFD Database
513	131420	Astraisoflavanin	C23H28O10	463.161	465.176			MWFD Database
467	136419	4',7-Dimethoxyisoflavone	C17H14O4	281.082	283.096			MWFD Database
51	136810	1,3-Di-tert-butylbenzene	C14H22	189.164	191.179	Aromatic hydrocarbon		Paranidharan 2008
214	145689	2-Hydroxy-3-methylcarbazole	C13H11NO	196.077	198.091	FP Flavonoids	Isoflavone	Bollina 2011;Gauthier, 2015;
438	145689	1-Hydroxy-N-methylcarbazole	C13H11NO	196.077	198.091			MWFD Database
42	145742	L-proline	C5H9NO2	114.056	116.071	Aminoacids and derivatives		Paranidharan 2008
458	150893	3,5,6,7,8;3';4'-Heptamethoxyflavone	C22H24O9	431.135	433.149			MWFD Database
323	151152	D-threonic acid	C4H8O5	135.03	137.044	Organic acid		Paranidharan 2008
120	152430	5-demethylsinensetin	C19H18O7	357.098	359.113	Flavonoids		Bollina 2010
147	155094	6-Prenylnaringenin	C20H20O5	339.124	341.138	FP Flavonoids	Flavanone	Gauthier, 2015
221	155094	6-Prenyl	C20H20O5	339.124	341.138	FP Flavonoids		Bollina, 2010
14	156979	Fumariflorine	C12H15NO4	236.093	238.107	Alkaloids		Bollina 2011
131	158280	7,4’ dihydroxyflavan	C15H14O3	241.087	243.102	FP Flavonoids	Flavanol	Bollina 2011
132	158280	7,4'-Dihydroxyflavan	C15H14O3	241.087	243.102	FP Flavonoids	Flavanol	Gauthier, 2015
350	159171	PM-Toxin B	C33H62O8	585.437	587.452	Others		Chamarthi 2014
349	159223	PM-Toxin A	C33H60O8	583.422	585.436	Others		Chamarthi 2014
409	159578	2-Oxo-6-dehydroxyneoanisatin	C15H18O7	309.098	311.113	Terpenoids	Sesquiterpene	Gauthier, 2015
519	161496	Bruceine B	C23H28O11	479.156	481.17			MWFD Database
480	165275	5-Diphosphomevalonic anion	C6H13O10P2-					MWFD Database
505	167792	aldehydo-D-gulose	C6H12O6	179.056	181.071			MWFD Database
345	171489	5-O-Methylembelin	C18H28O4	307.191	309.206	Others		Chamarti 2014
352	173651	Compactin diol lactone	C18H26O4	305.176	307.19	Others		Chamarti 2014
89	181528	Decenedioic acid	C10H16O4	199.098	201.112	Fatty acids and conjugates		Gauthier 2005
661	181534	N-palmitoyl phenylalanine	C25H41NO3	402.301	404.316			MWFD Database
733	182279	Terennoside	C16H22O9	357.119	359.134			MWFD Database
150	184877	Kuwanon L	C35H30O11	625.172	627.186	FP Flavonoids	Flavanone	Gauthier, 2015
309	193042	Dihydrocubebin	C20H22O6	357.134	359.149	Lignines		Bollina, 2010
124	197081	Cyanidin 3-O-glucoside	C21H21O11	448.101	450.116	FP Flavonoids	Antocyanin	Gauthier, 2015
423	219899	1-(2-phenylhydrazinyl)pentose	C11H16N2O5	255.099	257.113			MWFD Database
657	221118	Neoabietic Acid	C20H30O2	301.217	303.232			MWFD Database
104	236484	Octadecanedioic acid	C18H34O6	345.228	347.243	Fatty acids and conjugates		Paranidharan 2008
639	255320	Methyl pentofuranoside	C6H12O5	163.061	165.076			MWFD Database
486	315709	6,7,3',4'-Tetramethoxyflavone	C19H18O6	341.103	343.118			MWFD Database
620	332427	Lariciresinol	C20H24O6	359.15	361.165			MWFD Database
238	345501	Deoxypodophyllotoxin	C22H22O7	397.129	399.144	FP not flavonoids	Lignan and stilbene	Gauthier 2015
629	354446	Loganoside	C17H26O10	389.145	391.16			MWFD Database
721	439155	S-adenosylhomocysteine	C14H20N6O5S	383.114	385.129			MWFD Database
3	439215	galacturonic acid	C6H10O7	193.035	195.05	Acids		Campos-Bermudez, 2013
643	439230	mevalonic acid	C6H12O4	147.066	149.081			MWFD Database
723	439503	salicin	C13H18O7	285.098	287.113			MWFD Database
356	439514	Scopolin	C16H18O9	353.088	355.102	Phenolics and related metabolites		Hamzehzarghani, 2008
533	439664	Chlorophyllide a	C35H34MgN4O5	613.231	615.245			MWFD Database
737	440074	trans4HydroxyDproline	C5H9NO3	130.051	132.066			MWFD Database
436	440152	1-DL-(indole-3-acetyl)-myo-inositol	C16H19NO7	336.109	338.123			MWFD Database
662	440349	N-Succinyl-L-2-amino-6-oxopimelate	C11H15NO8	288.072	290.087			MWFD Database
555	440906	Deoxyloganin	C17H26O9	373.15	375.165			MWFD Database
329	441478	Glucoronic Acid	C6H10O7	193.035	195.05	Organic Acid		Hamzehzarghani, 2005
396	441802	Isobrucein a	C26H34O11	521.203	523.217	Terpenoids	Diterpene	Gauthier, 2015
416	441905	Astragaloside III	C41H68O14	783.454	785.468	Terpenoids	Triterpenoids	Bollina, 2010
394	442036	Hallactone B	C20H24O9S	439.107	441.121	Terpenoids	Diterpene	Gauthier, 2015
395	442044	Inumakilactone A glycoside	C24H30O13	525.161	527.176	Terpenoids	Diterpene	Gauthier, 2015
405	442425	Ipolamiide	C17H26O11	405.14	407.155	Terpenoids	Iridoids and derivatives	Gauthier, 2015
654	442428	naringin	C27H32O14	579.172	581.186			MWFD Database
146	442457	5'-Prenylhomoeriodictyol	C21H22O6	369.134	371.149	FP Flavonoids	Flavanone	Gauthier, 2015
170	442611	Isoscoparine	C22H22O11	461.109	463.123	FP Flavonoids	Flavone	Gauthier, 2015
523	442670	Cajanol	C17H16O6	315.087	317.102			MWFD Database
148	442769	Dalpanin	C26H30O12	533.166	535.181	FP Flavonoids	Flavanone	Gauthier, 2015
211	442770	5-Deoxykievitone	C20H20O5	339.124	341.138	FP Flavonoids	Isoflavanone	Gauthier, 2015;
284	442793	Gingerol	C17H26O4	293.176	295.19	FP not flavonoids	Phenolic Alcohol	Gauthier 2015
500	442830	Acanthoside D	C34H46O18	741.261	743.276			MWFD Database
231	442831	1-Acetoxypinoresinol	C22H24O8	415.14	417.154	FP not flavonoids	Lignan and stilbene	Gauthier 2015
540	442833	Cleistanthin	C28H28O11	539.156	541.17			MWFD Database
587	442836	Eucommin A	C27H34O12	549.198	551.212			MWFD Database
20	443012	Valeroidine	C13H23NO3	240.161	242.175	Alkaloids		Bollina 2011
219	443012	5-Deoxykievitone	C13H23NO3	240.161	242.175	FP Flavonoids	Phenolic Acid and derivatives	Bollina 2011
245	443015	Podorhizol beta-D-glucoside	C28H34O13	577.193	579.207	FP not flavonoids	Lignan and stilbene	Gauthier 2015
499	443024	Acanthoside B	C28H36O13	579.208	581.223			MWFD Database
495	443320	AC1L9EFE	C19H20N2O	291.15	293.165			MWFD Database
619	443328	Lamioside	C18H28O11	419.156	421.17			MWFD Database
406	443335	Iridotrial glucoside	C16H24O8	343.14	345.154	Terpenoids	Iridoids and derivatives	Gauthier, 2015
400	443340	10-Hydroxyloganin	C17H26O11	405.14	407.155	Terpenoids	Iridoids and derivatives	Gauthier, 2015
427	443347	11-Hydroxyiridodial glucoside pentaacetate	C26H36O13	555.208	557.223			MWFD Database
491	443349	7-Dehydrologanin tetraacetate	C25H32O14	555.172	557.186			MWFD Database
404	443352	Deutzioside	C15H22O9	345.119	347.134	Terpenoids	Iridoids and derivatives	Gauthier, 2015
680	443648	Pelargonidin 3-glucoside	C21H21O10+					MWFD Database
125	443652	Malvidin 3-O-Glucoside	C23H24O12	491.12	493.134	FP Flavonoids	Antocyanin	Gauthier, 2015
126	443917	Pelargonidin 3-O-rutinoside	C27H31O14	578.164	580.179	FP Flavonoids	Antocyanin	Gauthier, 2015
342	444212	trans-Aconitic acid	C6H6O6	173.009	175.024	Organic Acid		Paranidharan 2008
260	444539	cinnamic acid	C9H8O2	147.045	149.06	FP not flavonoids	Phenolic Acid and derivatives	Gauthier 2015
322	444791	D-glucuronic acid	C6H10O7	193.035	195.05	Organic Acid		Paranidharan 2008
324	444972	fumaric acid	C4H4O4	115.004	117.018	Organic Acid		Parandiharan 2008
718	445154	resveratrol	C14H12O3	227.071	229.086			MWFD Database
671	445638	palmitoleic acid	C16H30O2	253.217	255.232			MWFD Database
105	445639	oleic acid	C18H34O2	281.249	283.263	Fatty acids and conjugates		Gauthier 2005
263	445858	ferulic acid	C10H10O4	193.051	195.065	FP not flavonoids	Phenolic Acid and derivatives	Gauthier 2015
736	452855	Trachelogenin	C21H24O7	387.145	389.159			MWFD Database
139	467296	Epicatechin-3-O-(3-O-methylgallate)	C23H20O10	455.098	457.113	FP Flavonoids	Flavanol	Gauthier, 2015
579	467296	Epicatechin 3-O-(3-O-methylgallate)	C23H20O10	455.098	457.113			MWFD Database
521	471912	Caffeic acid tetramer glucoside	C42H40O21	879.199	881.213			MWFD Database
496	514181	AC1LAI3X	C40H30O26	925.095	927.11			MWFD Database
660	519748	Nonane	C15H24	203.181	205.195			MWFD Database
341	521261	Tetronic Acid	C4H4O3	99.0077	101.023	Organic Acid		Hamzehzarghani, 2005
735	583027	Tetrahydro-3-phenylthiophene 1-oxide	C10H12OS	179.054	181.068			MWFD Database
498	615196	AC1LDAX8	C34H67NO7Si6	768.346	770.361			MWFD Database
449	621824	2-4-6-Tritert-butylbenzenethiol	C18H30S	277.2	279.214			MWFD Database
581	636543	Erythro-canabisine H	C28H31NO8	508.198	510.212			MWFD Database
591	636550	Formosanatin A	C30H32O8	519.202	521.217			MWFD Database
545	637090	Crotonic acid	C4H6O2	85.0295	87.0441			MWFD Database
267	637541	m-Hydroxycinnamic acid	C9H8O3	163.04	165.055	FP not flavonoids	Phenolic Acid and derivatives
268	637542	p-coumaric acid	C9H8O3	163.04	165.055	FP not flavonoids	Phenolic Acid and derivatives	Bollina 2010
527	637760	Chalcone	C15H12O	207.082	209.096			MWFD Database
274	637775	Sinapic acid	C11H12O5	223.061	225.076	FP not flavonoids	Phenolic Acid and derivatives	Bollina, 2010
497	641663	AC1LD3CN	C20H28O10	427.161	429.176			MWFD Database
320	643757	cis-Aconitic acid	C6H6O6	173.009	175.024	Organic Acid		Paranidharan 2008
354	689043	caffeic acid	C9H8O4	179.035	181.05	phenolic acid		Atanasova-Penichon 2016
252	699414	4-Methoxycinnamic acid	C10H10O3	177.056	179.07	FP not flavonoids	Phenolic Acid and derivatives	Bollina 2011
536	709625	Cinnamoylglycine	C11H11NO3	204.067	206.081			MWFD Database
739	735755	Trimethoxycinnamic acid	C12H14O5	237.077	239.091			MWFD Database
644	854128	MLS001007317	C15H19N5O2S	332.119	334.133			MWFD Database
282	1549095	Coniferyl alcohol	C10H12O3	179.071	181.086	FP not flavonoids	Phenolic Alcohol	Gauthier 2015
10	1773166	12-Cytisineacetamide	C13H17N3O2	246.125	248.139	Alkaloids		Bollina 2011
259	1794427	Chlorogenic acid	C16H18O9	353.088	355.102	FP not flavonoids	Phenolic Acid and derivatives	Gauthier 2015
375	2723872	D-fructose	C6H12O6	179.056	181.071	Sugars
493	3010930	8-hydroxypinoresinol	C20H22O7	373.129	375.144			MWFD Database
235	3035544	5-Methoxypodophyllotoxin	C23H24O9	443.135	445.149	FP not flavonoids	Lignan and stilbene	Gauthier 2015
647	3036184	N-(3-Phenylpropionyl)glycine methylthio ester	C12H15NO2S	236.075	238.09			MWFD Database
325	3037582	Galactaric acid	C6H10O8	209.03	211.045	Organic Acid		Parandiharan 2008
539	3084296	Citrusin C	C16H22O7	325.129	327.144			MWFD Database
597	3084507	Gardenin C	C20H20O9	403.103	405.118			MWFD Database
556	3246945	DG(18:0/16:0/0:0)	C37H72O5	595.531	597.545			MWFD Database
622	3286789	Leucopelargonidin	C15H14O6	289.072	291.086			MWFD Database
133	4425707	Catechin 3-O-α-L-rhamnoside	C21H24O10	435.13	437.144	FP Flavonoids	Flavanol	Gauthier, 2015
592	5273569	Fraxetin	C10H8O5	207.03	209.044			MWFD Database
582	5274622	Erythro-carolignan E	C40H42O13	729.255	731.27			MWFD Database
281	5280372	Coniferin	C16H22O8	341.124	343.139	FP not flavonoids	Phenolic Alcohol	Gauthier 2015
215	5280378	7-Hydroxy-4′-methoxyisoflavone	C16H12O4	267.066	269.081	FP Flavonoids	Isoflavone	Gauthier, 2015;
249	5280406	1-O-Sinapoyl-beta-D-glucose	C17H22O10	385.114	387.129	FP not flavonoids	Phenolic Acid and derivatives	Gauthier 2015
106	5280411	oxophytodienoic acid	C18H28O3	291.195	293.211	Fatty acids and conjugates
181	5280417	3,7-Di-O-methylquercetin	C17H14O7	329.067	331.081	FP Flavonoids	Flavonol	Gauthier, 2015
179	5280441	Vitexin	C21H20O10	431.098	433.113	FP Flavonoids	Flavone	Gauthier, 2015
165	5280443	Apigenin	C15H10O5	269.046	271.06	FP Flavonoids	Flavone	Gauthier, 2015
717	5280486	Raucaffricine	C27H32N2O8	511.209	513.223			MWFD Database
289	5280507	Sinapyl alcohol	C11H14O4	209.082	211.096	FP not flavonoids	Phenolic Alcohol	Gauthier 2015
152	5280535	Nallaflavanone	C36H34O13	673.193	675.207	FP Flavonoids	Flavanone	Gauthier, 2015
287	5280535	P-Coumaryl alcohol	C9H10O2	149.061	151.075	FP not flavonoids	Phenolic Alcohol	Gauthier 2015
293	5280536	Coniferyl aldehyde	C10H10O3	177.056	179.07	FP not flavonoids	Phenolic Aldehyde	Gauthier 2015
123	5280559	N-Caffeoylputrescine	C13H18N2O3	249.124	251.139	FP		Gunnaiah, 2014
549	5280637	Cynaroside	C21H20O11	447.093	449.108			MWFD Database
294	5280802	Sinapaldehyde	C11H12O4	207.066	209.081	FP not flavonoids	Phenolic Aldehyde	Gauthier 2015
118	5280863	Luteolin	C15H10O6	285.039	287.055	Flavonoids	Flavonol	Gunnaiah, PhD
389	5280896	Raucaffricine	C15H20O4	263.129	265.143	Terpenoids	Abscisic acid derivatives and precursors	Gauthier, 2015
304	5280933	Sinapyl alcohol	C18H30O2	277.217	279.232	FP not flavonoids		Gunnaiah, 2014
101	5281166	Nallaflavanone	C12H18O3	209.118	211.133	Fatty acids and conjugates		Gauthier 2005
543	5281167	Coniferyl aldehyde	C6H12O	99.0815	101.096			MWFD Database
88	5281204	Cynaroside	C18H28O9	387.166	389.181	Fatty acids and conjugates		Cuperlovic-Culf, 2016; Gunnaiah, PhD
526	5281380	Ceceline	C19H16N2O2	303.114	305.128			MWFD Database
168	5281392	Calophyllolide	C26H24O5	415.155	417.17	FP Flavonoids	Flavone
575	5281440	Eleganin	C22H26O9	433.15	435.165			MWFD Database
607	5281542	Harpagoside	C24H30O11	493.172	495.186			MWFD Database
479	5281601	5128-44-9	C17H14O5	297.077	299.091			MWFD Database
488	5281638	6-Hydroxykaempferol	C15H10O7	301.034	303.05			MWFD Database
670	5281677	Pachypodol	C18H16O7	343.082	345.097			MWFD Database
719	5281691	Rhamnetin	C16H12O7	315.051	317.066			MWFD Database
236	5281712	Astringin	C20H22O9	405.119	407.134	FP not flavonoids	Lignan and stilbene	Gauthier 2015
234	5281724	4'-Prenyloxyresveratrol	C19H20O4	311.129	313.143	FP not flavonoids	Lignan and stilbene	Gauthier 2015
15	5281737	Macrophylline	C13H21NO3	238.145	240.159	Alkaloids		Bollina 2011
258	5281759	Caffeic acid glycoside	C15H18O9	341.088	343.102	FP not flavonoids	Phenolic Acid and derivatives	Gauthier 2015
435	5281760	1-Caffeoyl-4-deoxyquinic acid	C16H18O8	337.093	339.107			MWFD Database
485	5281762	5-O-Caffeoylshikimic acid	C16H16O8	335.077	337.092			MWFD Database
262	5281770	Diferulic acid	C20H18O8	385.093	387.107	FP not flavonoids	Phenolic Acid and derivatives	Gauthier 2015
308	5281789	Licoisoflavone A	C20H18O6	353.103	355.118	Isoflavonoid		Bollina 2010
360	5281796	Feruloylputrescine	C14H20N2O3	263.14	265.155	polyamines	hydroxycinnamic acid amides	Gauthier, 2015
369	5281862	Urushiol III	C21H32O2	315.233	317.248	Polyphenols		Chamarthi 2014
97	5281929	Jasmonic methyl ester	C13H20O3	223.134	225.149	Fatty acids and conjugates		Chamarti, 2014
638	5281929	Methyl jasmonate	C13H20O3	223.134	225.149			MWFD Database
565	5282066	dihydroxy-N-methylacridone	C14H11NO3	240.067	242.081			MWFD Database
388	5282224	Abscisic aldehyde	C15H20O3	247.134	249.149	Terpenoids	Abscisic acid derivatives and precursors	Gauthier, 2015
387	5282225	Abscisic alcohol	C15H22O3	249.15	251.164	Terpenoids	Abscisic acid derivatives and precursors	Gauthier, 2015
429	5282316	12-Nitrolinoleic acid	C18H31NO4	324.218	326.233			MWFD Database
568	5282673	dimethyl-2-eicosenoic acid	C22H42O2	337.311	339.326			MWFD Database
319	5282745	9-hexadecenoic acid	C16H30O2	253.217	255.232	Organic Acid		Atanasova-Penichon 2016; Hamzehzarghani, PhD
66	5282769	11- Eicosenoic acid	C20H38O2	309.279	311.294	Fatty acids and conjugates		Paranidharan 2008
70	5282782	2(Z),4(E)-Decadienoic acid	C12H20O2	195.139	197.154	Fatty acids and conjugates		Gauthier 2005
494	5282797	9Z,12E-octadecadienoic acid	C18H32O2	279.233	281.248			MWFD Database
80	5283022	8M13H9-11octdienoic acid	C19H34O4	325.237	325.238	Fatty acids and conjugates
111	5283028	Traumatic acid	C12H20O4	227.129	229.143	Fatty acids and conjugates		Chamarthi, 2014
466	5312433	3Z-hexadecatetraenoic acid	C16H24O2	247.17	249.185			MWFD Database
77	5312593	5,7-nonadienoic acid	C9H14O2	153.091	155.107	Fatty acids and conjugates
115	5312830	9S-HODE	C18H32O3	295.228	297.242	Fatty acids and derivatives	Oxylipines	Ludovici 2014
81	5312942	8-oxooctadeca-9-11-diynoic acid	C18H26O3	289.181	291.195	Fatty acids and conjugates
474	5314312	4-Methylcinnamic acid methyl ester	C11H12O2	175.076	177.091			MWFD Database
650	5315175	NA	C19H20N2O	291.15	293.165			MWFD Database
663	5315908	o-Cinnamoyltaxicin-i	C29H36O7	495.239	497.253			MWFD Database
222	5315911	cinnamoyltyramine	C17H17NO2	266.119	268.133	FP Flavonoids		Gunnaiah, 2012
183	5316673	Afzelin	C21H20O10	431.098	433.113	FP Flavonoids	Flavonol	Gunnaiah, 2012; Bollina,2010
290	5316860	Syringin	C17H24O9	371.135	373.149	FP not flavonoids	Phenolic Alcohol	Gauthier 2015
421	5318045	(z)-3-hexenyl beta-d-glucopyranoside	C12H22O6	261.134	263.149			MWFD Database
618	5318865	Kukoamine A	C28H42N4O6	529.303	531.318			MWFD Database
711	5320772	Psoralenol	C20H18O5	337.108	339.123			MWFD Database
201	5320863	Kaempferol-3-xyloside	C20H18O10	417.083	419.097	FP Flavonoids	Flavonol	Gauthier, 2015; Bollina 2011
714	5320863	Quercetin 3-O-beta-D-xylopyranoside	C20H18O11	433.078	435.092			MWFD Database
560	5321825	diferuloylputrescine	C24H28N2O6	439.187	441.202			MWFD Database
514	5358847	Auriculatin	C25H24O6	419.15	421.165			MWFD Database
371	5365890	(Z,E)-Farnesal	C15H24O	219.175	221.19	Sesquiterpenes
303	5366244	Phytol	C20H40O	295.301	297.315	FP not flavonoids		Mashietto 2015
554	5379033	Dehydrodiisoeugenol	C20H22O4	325.145	327.159			MWFD Database
511	5379081	Araneol	C18H16O7	343.082	345.097			MWFD Database
57	5383409	Scoparin	C22H22O11	461.109	463.123	Coumarin		Bollina, 2010
412	5458272	Eupacunolin	C22H28O8	419.171	421.186	Terpenoids	Sesquiterpene	Gauthier, 2015
552	5458468	Decylcitric acid	C16H28O7	331.176	333.191			MWFD Database
302	5458878	Feruloyltryptamine	C19H18N2O2	305.13	307.144	FP not flavonoids		Mashietto 2015
364	5458879	p-coumaroylserotonin	C19H18N2O3	321.124	323.139	polyamines	hydroxycinnamic acid amides	Gauthier, 2015
339	5460677	Ribonic Acid	C5H10O6	165.039	167.055	Organic Acid		Paranidharan 2008
18	5462438	Psychotrine	C28H36N2O4	463.26	465.275	Alkaloids		Bollina 2011
122	5481665	Isorhamnetin-3-O-rutinoside-7-O-glucoside	C34H42O21	785.215	787.229	Flavonoids		Bollina, 2010
617	5481882	Kaempferol 3-O-arabinoside	C20H18O10	417.083	419.097			MWFD Database
621	5486199	Lespenefril	C27H30O14	577.156	579.171			MWFD Database
67	5497123	13(S)-Hydroperoxylinolenic acid	C18H30O4	309.207	311.222	Fatty acids and conjugates		Gauthier 2005
29	5497150	Jasmonoyl-isoleucine	C18H29NO4	322.202	324.217	Aminoacids and derivatives
420	5716900	(9R,13R)-1a,1b-dihomo-jasmonic acid	C14H22O3	237.15	239.164			MWFD Database
419	5716902	(9R,13R)-10,11-dihydro-12-oxo-15-phytoenoic acid	C18H30O3	293.212	295.227			MWFD Database
437	5771760	1-hexadecanoyl-2-(9Z-octadecenoyl)-sn-glycero-3-phospho-(1'-myo-inositol-3'-phosphate)	C43H82O16P2	915.501	917.515			MWFD Database
599	5862476	Geranyl Cimmat	C19H24O2	283.17	285.185			MWFD Database
506	5945639	Alpha,alpha'-Diethyl-4;4'-bis(2-propynyloxy)stilbene	C24H24O2	343.17	345.185			MWFD Database
361	5969616	feruloylserotonine	C20H20N2O4	351.135	353.15	polyamines	hydroxycinnamic acid amides	Gauthier, 2015
464	6325261	3'-O-beta-D-Glucopyranosyl plumbagic acid methyl ester	C18H24O10	399.13	401.144			MWFD Database
187	6325460	Kaempferide 3,7-diglucoside	C28H32O16	623.162	625.176	FP Flavonoids	Flavonol	Gauthier, 2015
415	6437066	Salannin	C34H44O9	595.291	597.306	Terpenoids	Triterpene	Gauthier, 2015
729	6438621	Seselidiol	C17H24O2	259.17	261.185			MWFD Database
645	6439561	Mono-p-coumarylputrescine	C13H19ClN2O2	269.106	271.121			MWFD Database
363	6439562	p-Coumaroylputrescine	C13H18N2O2	233.13	235.144	polyamines	hydroxycinnamic acid amides	Gunnaiah 2012
61	6439873	9 HOTrE	C18H30O3	293.212	295.227	Fatty acids and conjugates	Oxilipines	Ludovici 2014
372	6440536	2-Propenoic acid	C23H28O8	431.171	433.186	sesquiterpenoids		Bollina, 2010
448	6440550	2-[(E)-3-(4-hydroxyphenyl)prop-2-enoyl]oxyethyl-trimethylazanium	C14H20NO3+					MWFD Database
456	6440783	3,4,5-Tri-O-caffeoylquinic acid	C34H30O15	677.151	679.166			MWFD Database
390	6441485	Xanthoxin	C15H22O3	249.15	251.164	Terpenoids	Abscisic acid derivatives and precursors	Gauthier, 2015
572	6454248	Doranine	C11H15ClN2	209.085	211.1			MWFD Database
623	6475724	Licuroside	C26H30O13	549.161	551.176			MWFD Database
509	6479876	Apigenin 7-O-.beta.-D-(4"-caffeoyl)glucuronide	C30H24O14	607.109	609.124			MWFD Database
25	6995277	D-threonine zwitterion	C4H9NO3	118.051	120.066	Aminoacids and derivatives
490	9543641	6Z-Octene-2,4-diynoic acid	C8H6O2	133.03	135.044			MWFD Database
103	9543675	Octadeca-9-ene-1,18-dioic-acid	C18H32O4	311.223	313.237	Fatty acids and conjugates
558	9543891	Diacylglycerol(20:5/20:5)	C43H64O5	659.468	661.483			MWFD Database
557	9543951	DG(20:5/22:6/0:0)[iso2]	C45H66O5	685.484	687.498			MWFD Database
678	9546800	PE(16:0/20:4)	C41H74NO8P	738.508	740.522			MWFD Database
418	9547268	(6RS)-22-oxo-23,24,25,26,27-pentanorvitamin D3 6,19-sulfur dioxide adduct	C22H32O4S	391.195	393.209			MWFD Database
71	9548881	2-3-Dinor-8-iso-Prostaglandin F2alpha	C18H30O5	325.202	327.217	Fatty acids and conjugates		Gauthier 2005
60	9548882	2;3-Dinor-8-iso PGF1alpha	C18H32O5	327.218	329.232	Fatty acids and conjugates	Eicosanoids (Prostaglandins)
251	9799386	3-Feruloylquinic acid	C17H20O9	367.103	369.118	FP not flavonoids	Phenolic Acid and derivatives	Gauthier 2015
212	9817274	Sappanone A	C16H12O5	283.061	285.076	FP flavonoids	Isoflavanone	Bollina, 2011
116	9843255	7-Hydroxy-3,5,6,3',4'-pentamethoxyflavone	C20H20O8	387.109	389.123	Flavones and flavonols
362	9995324	N-Cinnamoyl Serotonin	C19H18N2O2	305.13	307.144	polyamines	hydroxycinnamic acid amides	Gauthier, 2015
12	10038072	cyathocaline	C14H11NO4	256.062	258.076	Alkaloids		Bollina 2011
656	10131281	N-Decanoyl-L-Homoserine lactone	C14H25NO3	254.176	256.191			MWFD Database
62	10236635	12,13 DiHOME	C18H34O4	313.238	315.253	Fatty acids and conjugates	Oxylipines	Ludovici 2014
351	10345235	SEGETALIN B	C24H32N6O5	483.236	485.251	Others		Bollina,2010
163	10382485	6-Prenylapigenin	C20H18O5	337.108	339.123	FP Flavonoids	Flavone	Gauthier, 2015
727	10483858	SEGETALIN A	C31H43N7O6	608.32	610.335			MWFD Database
475	10604651	4'-O-beta-D-glucosyl-cis-p-coumaric acid	C15H18O8	325.093	327.107			MWFD Database
196	10652679	Kaempferol-3-gentiobioside-7-rhamnoside	C33H40O20	755.204	757.219	FP Flavonoids	Flavonol	Gauthier, 2015; Bollina, 2010
576	10685477	Enterolactone	C18H18O4	297.113	299.128			MWFD Database
348	10746751	Piloside B	C28H36O17	643.188	645.203	Others		Bollina 2011
596	10794070	Gambogenic Acid	C38H46O8	629.312	631.327			MWFD Database
551	10877291	D-arabinofuranose	C5H10O5	149.046	151.06			MWFD Database
134	11067541	Catechin 5,7,3’, trimethylehere	C18H20O6	331.119	333.133	FP Flavonoids	Flavanol	Gauthier, 2015
738	11561034	trans-Zeatin riboside monophosphate	C15H22N5O8P	430.113	432.128			MWFD Database
553	11694869	Dehydroabietal	C20H28O	283.207	285.221			MWFD Database
261	11824478	Dehydrodiconiferyl alcohol	C20H22O6	357.134	359.149	FP not flavonoids	Phenolic Acid and derivatives	Bollina 2011
445	11825308	2,3-Dimethoxy-5-[2-hydroxy-3-(beta-D-glucopyranosyloxy)propyl]phenol	C17H26O10	389.145	391.16			MWFD Database
743	11953806	Vomilenine	C21H22N2O3	349.156	351.17			MWFD Database
385	11954194	8'-Hydroxyabscisate	C15H20O5	279.123	281.138	Terpenoids	Abscisic acid derivatives and precursors	Gauthier, 2015
428	11966210	12-hydroxyjasmonic acid 12-O-beta-D-glucoside	C19H30O8	385.187	387.201			MWFD Database
508	12306850	Anisatin	C15H20O8	327.109	329.123			MWFD Database
255	13916049	7-O-Glucoside-ferulic acid	C16H20O9	355.103	357.118	FP not flavonoids	Phenolic Acid and derivatives	Gunnaiah, 2012
590	13916049	Ferulic acid O-glucoside	C16H20O9	355.103	357.118			MWFD Database
483	13963770	5-Hydroxy-7,8-Dimethoxyflavanone	C17H16O5	299.092	301.107			MWFD Database
542	14035432	Coniferinoside	C22H32O13	503.177	505.192			MWFD Database
715	14162696	Quercetin 5,3'-dimethyl ether	C17H14O7	329.067	331.081			MWFD Database
713	14162697	Quercetin 3;5;3'-trimethyl ether	C18H16O7	343.082	345.097			MWFD Database
174	14237661	Lupinisoflavone G	C25H26O6	421.166	423.18	FP Flavonoids	Flavone	Gauthier, 2015
562	14427336	Dihydroconiferin	C16H24O8	343.14	345.154			MWFD Database
373	14433053	3b-Hydroxycinnamolide	C15H22O3	249.326	251.341	sesquiterpenoids		Bollina, 2010
178	14583601	Ulexone B	C25H22O5	401.139	403.154	FP Flavonoids	Flavone	Gauthier, 2015
716	14825498	Ramontoside	C34H38O16	701.209	703.223			MWFD Database
16	15071430	Murranimbine	C36H34N2O2	525.255	527.269	Alkaloids		Bollina, 2010
564	15545709	Dihydroxy-herbertene	C15H22O2	233.155	235.169			MWFD Database
741	15838234	Unanisoflavan	C22H26O5	369.171	371.185			MWFD Database
744	15939882	ZINC6222190	C13H17N3O2	246.125	248.139			MWFD Database
347	15954045	Mg-Protoporphyrin	C34H32MgN4O4	583.22	585.235	Others		Chamarti 2014
454	16061057	2R-HpOTrE	C18H30O5	325.202	327.217			MWFD Database
732	16129778	Tannic Acid	C76H52O46	1699.17	1701.18			MWFD Database
655	16659826	N-Caffeoyl serotonin	C19H18N2O4	337.119	339.134			MWFD Database
58	20055255	Scoparine	C22H22O11	461.109	463.123	Coumarin		Bollina,2010
531	21226108	CHEMBL156023	C47H83O13P	885.55	887.564			MWFD Database
56	21574272	Cis-grandmarin	C15H16O6	291.087	293.102	Coumarin
121	21580252	Diandraflavone	C28H32O13	575.177	577.192	Flavonoids
135	21676366	Catechin 7-O-apiofuranoside	C20H22O10	421.114	423.129	FP Flavonoids	Flavanol	Gauthier, 2015
422	22298557	(Z)-Resveratrol 3;4'-diglucoside	C26H32O13	551.177	553.192			MWFD Database
78	22833574	5-Pyrophosphate mevalonic acid	C6H14O10P2	306.999	309.014	Fatty acids and conjugates
198	22838616	kaempferol-3-rhamnoside	C21H20O10	431.098	433.113	FP Flavonoids	Flavonol	Bollina, 2011
218	23259413	Methylophiopogonone B	C19H18O5	325.108	327.123	FP Flavonoids	Isoflavonol	Gauthier, 2015;
127	23724704	Pelargonidin 3-O-sophoroside	C27H31O15	594.159	596.174	FP Flavonoids	Antocyanin	Gauthier, 2015
546	23724737	Cyanidin-3-O-(6''-O-malonyl-2''-O-glucuronyl)glucoside	C30H31O20+					MWFD Database
676	24778807	PC(18:0/11:1)	C37H72NO8P	688.492	690.507			MWFD Database
677	24779371	PC(O-11:1/2:0)	C21H42NO7P	450.263	452.277			MWFD Database
442	24779450	1-tridecanoyl-sn-glycero-3-phosphocholine	C21H44NO7P	452.278	454.293			MWFD Database
455	24779499	2-valeryl-sn-glycero-3-phosphocholine	C13H28NO7P	340.153	342.168			MWFD Database
441	24779520	1-pentyl-sn-glycero-3-phosphocholine	C13H30NO6P	326.174	328.188			MWFD Database
602	24892796	Glutathionylaminopropylcadaverine	C18H36N6O5S	447.24	449.254			MWFD Database
432	25200803	15-Dihydroepioxylubimin	C15H26O3	253.181	255.195			MWFD Database
651	25201445	NA	C16H21O10-					MWFD Database
173	25202368	isovitexin-7-O-glucosyl-rhamnoside	C33H40O19	739.209	741.224	FP Flavonoids	Flavone	Gauthier, 2015
492	25208761	7-Methoxygambogellic acid	C39H46O9	657.307	659.321			MWFD Database
220	25244310	Dihydroconiferyl alcohol glucoside	C16H24O8	343.14	345.154	FP Flavonoids	Phenolic Acid and derivatives	Chamarthi, 2014; Gunnaiah, 2012, 2014
295	25244544	sinapaldehyde glucoside	C17H22O9	369.119	371.134	FP not flavonoids	Phenolic Aldehyde	Gauthier 2015
544	25245514	coumaroylagmatine	C14H21N4O2+					Dhokane - ‎2016
453	40467846	2-phospho-D-glycerate	C3H4O7P-3					MWFD Database
652	40846579	NAla	C23H37NO3	374.27	376.285			MWFD Database
424	42607396	1-(9Z-octadecenoyl)-2-(5Z	C47H76O11	815.531	817.546			MWFD Database
696	42607493	PI(16:0/0:0)	C25H49O12P	571.289	573.303			MWFD Database
664	42607562	Okanin 4'-(6''-p-coumarylglucoside)	C30H28O13	595.146	597.16			MWFD Database
447	42607580	2';4';4-Trihydroxy-3'; 3-dimethoxychalcone 4'-O-glucoside	C23H26O11	477.14	479.155			MWFD Database
130	42607603	Chalconaringenin 2'-xyloside	C20H20O9	403.103	405.118	FP Flavonoids	Chalcon	Gauthier, 2015
129	42607604	Chalconaringenin 2'-rhamnosyl-(1->4)-xyloside	C26H30O13	549.161	551.176	FP Flavonoids	Chalcon	Gauthier, 2015
459	42607625	3;4';6'-Trihydroxy-4;2'-dimethoxychalcone 4'-O-rutinoside	C29H36O15	623.198	625.213			MWFD Database
722	42607658	Safflomin C	C30H30O14	613.156	615.171			MWFD Database
593	42607738	Furano[2'';3'':6;7]aurone	C17H10O3	261.056	263.07			MWFD Database
149	42607846	Exiguaflavanone	C30H34O7	505.223	507.238	FP flavonoids	Flavanone	Gauthier, 2015
229	42607876	Quercetol C	C22H24O5	367.155	369.17	FP not flavonoids	Flavanone
145	42607881	5-O-Methylleridol	C19H20O5	327.124	329.138	FP Flavonoids	Flavanone	Gauthier, 2015
705	42607892	Poriolide	C29H26O12	565.135	567.15			MWFD Database
477	42607913	5,7,4'-Trihydroxyflavanone 7-O-arabinosylglucoside	C26H30O14	565.156	567.171			MWFD Database
478	42607916	5,7;4'-Trihydroxyflavonone 4'-O-xylosylglucoside	C26H30O14	565.156	567.171			MWFD Database
156	42607925	Naringenin 7-O-(2'',6''-di-O-alpha-rhamnopyranosyl)-beta-glucopyranoside	C33H42O18	725.23	727.244	FP Flavonoids	Flavanone	Gauthier, 2015
470	42608018	4'-Hydroxy-5,7;2'-trimethoxyflavanone 4'-rhamnosyl-(1->6)-glucoside	C30H38O15	637.214	639.228			MWFD Database
482	42608074	5-Hydroxy-7,4'-dimethoxy-6,8-di-C-prenylflavanone 5-O-galactoside	C25H30O10	489.177	491.191			MWFD Database
681	42608082	Persiconin	C23H26O11	477.14	479.155			MWFD Database
144	42608111	5-Hydroxy-7,8 dimethoxyflavanone 5-rhamnoside	C23H26O	445.15	447.165	FP Flavonoids	Flavanone	Gauthier, 2015
413	42639972	Cineracipadesin F	C33H40O13	643.24	645.254	Terpenoids	Triterpene	Gauthier, 2015
30	44123342	jasmonyl-L-valine	C17H27NO4	308.186	310.201	Aminoacids and derivatives		Paranidharan 2008
528	44229226	CHEBI:57924	C9H9NO4	194.046	196.06			MWFD Database
443	44237241	2-(6'-methylthio)hexylmalate	C11H20O5S	263.096	265.11			MWFD Database
430	44256504	13-Tetradenoic acid	C14H22O3	237.15	239.164			MWFD Database
679	44256626	Pelargonidin 3 rutinoside	C27H31O14+					MWFD Database
624	44256707	LMPK12010102	C39H43O22+					MWFD Database
634	44257034	Malvidin 3-glucoside-pyruvate	C26H25O14+					MWFD Database
578	44257074	Epicatechin 3-O-(2-trans-cinnamoyl-beta-D-allopyranoside)	C30H30O12	581.166	583.181			MWFD Database
138	44257094	Epicatechin 5-O-β-D-glucopyranoside-3-benzoate	C20H28O12	459.151	461.165	FP Flavonoids	Flavanol	Gauthier, 2015
701	44257126	Plumerubroside	C24H30O12	509.166	511.181			MWFD Database
515	44257128	Barbatoflavan	C24H28O13	523.146	525.16			MWFD Database
702	44257132	Pneumatopterin A	C29H38O15	625.214	627.228			MWFD Database
625	44257143	LMPK12020184	C20H24O6	359.15	361.165			MWFD Database
136	44257153	Catechin-4-ol 3-O-β-D-galactopyranoside	C21H24O12	467.12	469.134	FP Flavonoids	Flavanol	Gauthier, 2015
525	44257153	Catechin4ol3ObetaDgalactopyranoside	C21H24O12	467.12	469.134			MWFD Database
626	44257384	LMPK12050477	C26H30O12	533.166	535.181			MWFD Database
180	44257684	Vitexin 2''-O-(E)-ferulate	C31H28O13	607.146	609.16	FP Flavonoids	Flavone	Gauthier, 2015
307	44257722	Hemsleyanoside	C26H28O13	547.146	549.16	Isoflavonoid		Bollina 2010
171	44257728	Isovitexin 2''-O-(6'''-feruloyl)glucoside	C37H38O18	769.199	771.213	FP Flavonoids	Flavone	Gauthier, 2015
172	44257742	Isovitexin 7-O-xyloside	C26H28O14	563.141	565.155	FP Flavonoids	Flavone	Gauthier, 2015
166	44257811	Apigenin 7-O-rutinoside	C27H30O14	577.156	579.171	FP Flavonoids	Flavone	Gauthier, 2015
510	44257823	Apigenin 7-rhamnoside-4'-rutinoside	C33H40O18	723.214	725.229			MWFD Database
169	44257987	Isoorientin 4'-O-glucoside-2''-O-(E)-caffeate	C36H36O19	771.178	773.192	FP Flavonoids	Flavone	Gauthier, 2015
631	44258116	Luteolin 7-(6'''-acetylallosyl-(1->2)-glucoside)	C29H32O17	651.157	653.171			MWFD Database
185	44258179	Isoscoparin 7-O-glucoside	C28H32O16	623.162	625.176	FP Flavonoids	Flavonol	Gauthier, 2015
177	44258273	Tricin 7-rutinoside	C29H34O16	637.177	639.192	FP Flavonoids	Flavone	Gauthier, 2015
516	44258526	Bausplendin	C18H12O7	339.051	341.066			MWFD Database
175	44258551	Skullcapflavone I 2'-(4''-E-Cinnamoylglucoside)	C32H30O12	605.166	607.181	FP Flavonoids	Flavone	Gauthier, 2015
346	44258567	Isoscutellarein 7-xyloside	C20H18O10	417.083	419.097	Others		Bollina, 2010
189	44258934	Kaempferol 3- rhamnoside- 7- glucoside	C27H30O15	593.151	595.166	FP Flavonoids	Flavonol	Bollina, 2010
195	44258949	Kaempferol 3-rhamnoside-7-glucosyl-(1->2)-rhamnoside	C33H40O19	739.209	741.224	FP Flavonoids	Flavonol	Gauthier, 2015;Bollina, 2010
190	44259008	Kaempferol 3-(2''-(Z)-p-coumaroylrhamnoside)	C30H26O12	577.135	579.15	FP Flavonoids	Flavonol	Gauthier, 2015
524	44259082	Caohuoside D	C28H34O12	561.198	563.212			MWFD Database
188	44259085	Kaempferide 3-glucoside-7-rhamnoside	C28H32O15	607.167	609.181	FP Flavonoids	Flavonol	Gauthier, 2015; Bollina, 2010
615	44259405	Isorhamnetin 7-alpha-D-Glucosamine	C22H23NO11	476.12	478.134			MWFD Database
355	44259493	Syringetin 3-rutinoside	C29H34O17	653.172	655.187	phenolic acid		Bollina, 2010
720	44259592	Rhamnetin 3-rhamnoside	C22H22O11	461.109	463.123			MWFD Database
210	44259596	Rhamnetin 3-rhamninoside	C34H42O20	769.22	771.234	FP Flavonoids	Flavonol	Gauthier, 2015;Bollina, 2010
205	44259659	Quercetin 3-methyl ether 7-galactoside	C22H22O12	477.104	479.118	FP Flavonoids	Flavonol	Bollina,2010
182	44259775	6-Hydroxykaempferol 7,4′-dimethyl ether 3-sulfate	C17H14O10S	409.023	411.038	FP Flavonoids	Flavonol	Gauthier, 2015
627	44259865	LMPK12112976	C23H24O8	427.14	429.154			MWFD Database
628	44259890	LMPK12113046	C23H24O14	523.109	525.124			MWFD Database
532	44567511	CHEMBL464848	C23H26O7	413.161	415.175			MWFD Database
55	44577222	vanilloloside	C14H20O8	315.109	317.123	Carbohydrates and carbohydrate conjugates		Cuperlovic-Culf, 2016
610	45485025	Hordatine A	C28H38N8O4	549.294	551.309			MWFD Database
468	46173242	4-coumaroyl-3-hydroxyagmatine	C14H21N4O3+					MWFD Database
359	46173376	feruloylagmatine	C15H22N4O3	305.162	307.176	polyamines	hydroxycinnamic acid amides	Gauthier, 2015
386	46173811	Abscisic acid glucose ester	C21H30O9	425.182	427.196	Terpenoids	Abscisic acid derivatives and precursors	Gauthier, 2015
691	46891830	Phosphatidyl-DL-glycerol	C42H78NaO10P	795.516	797.53			MWFD Database
673	52922192	PC(13:0/20:3(8Z;11Z;14Z))	C41H76NO8P	740.524	742.538			MWFD Database
674	52922194	PC(13:0/20:4(5Z;8Z;11Z;14Z))	C41H74NO8P	738.508	740.522			MWFD Database
675	52922587	PC(17:2(9Z;12Z)/14:1(9Z))	C39H72NO8P	712.492	714.507			MWFD Database
710	52925775	PS(20:5(5Z;8Z;11Z;14Z;17Z)/19:1(9Z))	C45H76NO10P	820.513	822.528			MWFD Database
630	52926279	LPS(18:2(9Z;12Z)/0:0);PS(18:2(9Z;12Z)/0:0)	C24H44NO9P	520.268	522.283			MWFD Database
688	52926309	PG(20:4(5Z;8Z;11Z;14Z)/22:6(4Z;7Z;10Z;13Z;16Z;19Z))	C48H75O10P	841.503	843.517			MWFD Database
682	52926331	PG(12:0/22:2(13Z;16Z))	C40H75O10P	745.503	747.517			MWFD Database
683	52926348	PG(13:0/20:1(11Z))	C39H75O10P	733.503	735.517			MWFD Database
684	52926351	PG(13:0/20:4(5Z;8Z;11Z;14Z))	C39H69O10P	727.456	729.47			MWFD Database
685	52926402	PG(14:1(9Z)/22:4(7Z;10Z;13Z;16Z))	C42H73O10P	767.487	769.501			MWFD Database
686	52926485	PG(16:1(9Z)/20:5(5Z;8Z;11Z;14Z;17Z))	C42H71O10P	765.471	767.486			MWFD Database
687	52926744	PG(19:0/22:6(4Z;7Z;10Z;13Z;16Z;19Z))	C47H81O10P	835.549	837.564			MWFD Database
689	52927378	PG(P-18:0/17:2(9Z;12Z))	C41H77O9P	743.523	745.538			MWFD Database
694	52927506	PI(13:0/20:3(8Z;11Z;14Z))	C42H75O13P	817.487	819.502			MWFD Database
695	52927600	PI(15:1(9Z)/19:1(9Z))	C43H79O13P	833.519	835.533			MWFD Database
697	52927641	PI(16:1(9Z)/20:5(5Z;8Z;11Z;14Z;17Z))	C45H75O13P	853.487	855.502			MWFD Database
698	52928008	PI(20:2(11Z;14Z)/22:4(7Z;10Z;13Z;16Z))	C51H87O13P	937.581	939.596			MWFD Database
109	52928605	PI(18:2(9Z;12Z)/0:0)	C27H49O12P	595.289	597.303	Fatty acids and conjugates
665	52928658	PA(12:0/22:4(7Z;10Z;13Z;16Z))	C37H65O8P	667.434	669.449			MWFD Database
666	52928675	PA(13:0/20:2(11Z;14Z))	C36H67O8P	657.45	659.465			MWFD Database
667	52928682	PA(13:0/22:4(7Z;10Z;13Z;16Z))	C38H67O8P	681.45	683.465			MWFD Database
668	52928751	PA(15:0/22:6(4Z;7Z;10Z;13Z;16Z;19Z))	C40H67O8P	705.45	707.465			MWFD Database
669	52928780	PA(15:1(9Z)/22:2(13Z;16Z))	C40H73O8P	711.497	713.512			MWFD Database
530	52940854	CHEMBL1288770	C15H28O2	239.202	241.216			MWFD Database
632	53326135	Macrophylline B	C25H32N2O5	439.224	441.238			MWFD Database
431	53486401	148244-82-0	C32H46O16	685.271	687.286			MWFD Database
108	53887649	Pentadecenoic acid	C15H28O2	239.202	241.216	Fatty acids and conjugates		Paranidharan 2008
724	54685734	Sanclomycine	C22H24N2O8	443.146	445.161			MWFD Database
529	54740347	CHEBI:58719	C35H38N4O7-2					MWFD Database
520	56936277	Butyl 3-O-beta-D-glucopyranosyl-butanoate	C14H26O8	321.155	323.17			MWFD Database
452	56936282	2-O-(beta-D-galactopyranosyl-(1->6)-beta-D-galactopyranosyl) 2S-hydroxytridecanoic acid	C25H46O13	553.287	555.301			MWFD Database
706	57397163	Pouoside B	C40H64O12	735.433	737.447			MWFD Database
128	67218246	2',4'-Dihydroxy-6'-methoxychalcone	C16H14O4	269.082	271.096	FP Flavonoids	Chalcon	Gauthier, 2015
600	68985354	Geranyl cinnamate	C19H24O2	283.17	285.185			MWFD Database
512	70698921	Astaxanthin glucoside	C46H62O9	757.432	759.447			MWFD Database
95	71339280	Heptadetrienoic acid	C17H26O	245.191	279.195	Fatty acids and conjugates		Gauthier 2005
269	71447328	p-Coumaroyl shikimic acid	C16H16O7	319.082	321.097	FP not flavonoids	Phenolic Acid and derivatives	Gauthier 2015
305	71752010	Triacetyl resveratrol	C20H18O6	353.103	355.118	FP not flavonoids		Bollina, 2011
537	71752010	cis Resveratrol penta-O-acetyl-4'-|A-D-glucuronide Methyl Ester	C31H32O14	627.172	629.186			MWFD Database
410	91819768	3-Hydroxy-15-dihydrolubimin	C15H26O3	253.181	255.195	Terpenoids	Sesquiterpene	Gauthier, 2015
612	91820526	indole-3-butyryl-glucose	C18H23NO7	364.14	366.155			MWFD Database
399	101356834	Isovaleroyloxylinalool	C15H26O3	253.181	255.195	Terpenoids	Hemiterpene	Gauthier, 2015
254	101701632	7-O-(4-Methoxycinnamoyl)tecomoside	C26H32O12	535.182	537.197	FP not flavonoids	Phenolic Acid and derivatives	Gauthier 2015; Bollina 2010
417	101937994	6'-O-alpha-D-Xylopyranosylalangiside	C30H39NO14	636.23	638.244	Terpenoids		Bollina 2010
296	101939806	(+)-Rangiformic acid	C21H38O6	385.26	387.274	FP not flavonoids		Bollina, 2011
381	101967018	Sylvestroside III	C27H36O14	583.203	585.218	Sugars		Bollina, 2010
200	102004842	Kaempferol-3-sophoroside-7-rhamnoside	C33H40O20	755.204	757.219	FP Flavonoids	Flavonol	Bollina, 2010
397	102247149	phytocassane B	C20H30O4	333.207	335.222	Terpenoids	Diterpene	Gauthier, 2015
59	118855852	Icosanoic acid	C20H40O2	311.296	313.31	Fatty acids		Chamarthi, 2014
353	133562584	Isogambogic acid	C38H44O8	627.296	629.311	Others		Bollina 2011
119	5280417	Quercetin 3,7-dimethyl ether	C17H14O7	329.067	331.081	Flavonoids	Flavonol	Bollina 2011
68	56928100	18-oxo-Oleic acid	C18H32O3	295.228	297.242	Fatty acids and conjugates		Gauthier 2005
367	1102	spermidine	C7H19N3	144.151	146.165	polyamines
85	200164	Adipate	C6H10O4	145.051	147.065	Fatty acids and conjugates		Gauthier 2005
65	3014565	10-Methyl-lauric acid	C13H26O2	213.186	215.201	Fatty acids and conjugates		Gauthier 2005
313	3442	Fusaric Acid	C10H13NO2	178.086	180.102	Mycotoxins
279	5282096	Caffeoyl alcohol	C9H10O3	165.056	167.07	FP not flavonoids	Phenolic Alcohol	Gauthier 2015
91	5312880	Dioxo-decanoic	C10H16O4	199.098	201.112	Fatty acids and conjugates		Gauthier 2005
167	5319484 -	Apigenin 7-O-β-D-glucuronide	C21H18O11	445.078	447.092	FP Flavonoids	Flavone	Gauthier, 2015
378	5793	glucose	C6H12O6	179.056	181.071	Sugars
465	C00000366 b	3-oxo-2-(2-entenyl) cyclopentaneoctanoic acid	C18H30O3	293.212	295.227			MWFD Database
117	C00005839b	Kaempferol 3-(2"-p-coumaryl-Alfa-L-Arabinopyranoside)	C29H24O12	563.12	565.134	Flavonoids	Flavones and Flavonols
154	C00006577	Naringenin 5,7-dimethyl ether 4'-O-xylosyl-(1->4)-arabinoside	C27H32O13	563.177	565.192	FP Flavonoids	Flavanone	Gauthier, 2015
614	C00007576b	Indole-3-carboxylic acid β-D-glucopyranosyl ester	C15H17NO7	322.093	324.108			MWFD Database
155	C00008226	Naringenin 7,4'-dimethyl ether	C17H16O5	299.092	301.107	FP Flavonoids	Flavanone	Gauthier, 2015
143	C00008264	5-Hydroxy-7,4'-dimethoxy-6,8-di-C-prenylflavanone 5-O-galactoside	C25H30O10	489.177	491.191	FP Flavonoids	Flavanone	Gauthier, 2015
142	C00008496	5,7,3',4'-Tetrahydroxy-6,8-di-C-prenylflavanone	C25H28O6	423.181	425.196	FP Flavonoids	Flavanone	Gauthier, 2015
141	C00008992b	Gallocatechin-4 β-ol	C15H14O8	321.062	323.076	FP Flavonoids	Flavanol	Gauthier, 2015
216	C00009812	7-Prenyloxy-3′,4′-dimethoxyisoflavone	C22H22O5	365.139	367.154	FP Flavonoids	Isoflavone	Gauthier, 2015;
291	C00011173b	trans-p-Ferulyl alcohol 4-O-[6-(2-methyl-3-hydroxypropionyl)] glucopyranoside	C20H28O10	427.161	429.176	FP not flavonoids	Phenolic Alcohol	Gauthier 2015: Bollina 2010
193	C00013757b	Kaempferol 3-apiosyl-(1->4)-rhamnoside-7-rhamnoside	C32H38O18	709.199	711.213	FP Flavonoids	Flavonol	Gauthier, 2015; Bollina, 2010
391	C00022795b	16-Diacetoxy-7a-hydroxy-18-malonyloxyent-cleroda-3-ene	C27H42O9	509.276	511.29	Terpenoids	Diterpene	Bollina, 2010,2011; Miroslava Cuperlovic-Culf, 2016
299	C00025375	Acetyllycoclavine	C20H31NO4	348.218	350.233	FP not flavonoids		Bollina 2011
17	C00028702	N-Methylheteropsine	C36H30N2O4	553.213	555.228	Alkaloids		Bollina 2011
13	C0004586b	Doryanine	C11H9NO3	202.051	204.066	Alkaloids		Bollina 2011
79	nd	7-Dehydrologanin tetra acetic acid	C25H32O14	555.171	557.186	Fatty acids and conjugates
217	ND	2-Hydroxyisoflavone naringenin	C15H12O6	287.056	289.071	FP Flavonoids	Isoflavones	Gunnaiah, 2012; Gauthier, 2015;
1		1,2,3 tricarboxilix acid	C6H8O7	191.02	193.034	Acids		Campos-Bermudez, 2013
63	54758681	(+)-7-iso-Jasmonoyl-L-isoleucine	C18H29NO4	322.202	324.217	Fatty acids and conjugates		Gauthier 2005
64	441449	10,16-Dihydroxy-hexadecanoic acid	C16H32O4	287.223	289.237	Fatty acids and conjugates		Bollina, 2010
73	nd	2-Methoxy-6(Z)-haxadecenoic acid	C9H10O3	165.056	167.07	Fatty acids and conjugates
74	5282766	2-Nonadecenoic acid	C19H36O2	279.481	297.279	Fatty acids and conjugates
76	20848956	3-Hydroxytetradecanedioic acid	C14H26O5	273.345	275.185	Fatty acids and conjugates		Gauthier 2005
82	5312830	9(S)-Hydroxy-10(E),12(Z)-octadecadienoic acid	C18H32O3	295.228	297.242	Fatty acids and conjugates		Gauthier 2005
83	9818312	9,10-Epoxy-18-hydroxystearic acid	C18H34O4	313.238	315.253	Fatty acids and conjugates		Gauthier 2005
90	129853925	8-11-Dihydroxylinoleic acid	C18H32O4	311.223	313.237	Fatty acids and conjugates		Gauthier 2005
92	12736	Dodecanedioic acid	C12H22O4	229.145	231.159	Fatty acids and conjugates		Gauthier 2005
96	29373	Heptenoic acid	C7H12O2	127.076	129.091	Fatty acids and conjugates		Gauthier 2005
99	5280450	Linoleic acid	C18H32O2	279.233	281.248	Fatty acids and conjugates		Gauthier 2005
114	94216	ω-Hydroxydodecanoic acid	C12H24O3	215.165	217.18	Fatty acids and conjugates		Bollina, 2010
151	nd	Mucronulatol-(4->6) naringenin	C32H28O10	571.161	573.176	FP Flavonoids	Flavanone	Gauthier, 2015
158	nd	3,5,7′-Trihydroxy-4-methoxyflavone	C16H14O6	301.072	303.086	FP Flavonoids	Flavone	Gauthier, 2015
159		5,4'-dihydroxy-3,6,7,8,2'-pentamethoxyflavone	C20H20O9	403.103	405.118	FP Flavonoids	Flavone	Gauthier, 2015
160		5,6-Dimethoxyflavone	C17H14O4	281.082	283.096	FP Flavonoids	Flavone	Gauthier, 2015
161		5,7,2′-Trihydroxy-8,6′-dimethoxyflavone	C17H14O7	329.067	331.081	FP Flavonoids	Flavone	Gauthier, 2015
162		5,7,3′,5′-Tetrahydroxy-8,4′-dimethoxyflavone	C17H14O8	345.062	347.076	FP Flavonoids	Flavone	Gauthier, 2015
164		Alpinumisoflavone dimethyl ether	C22H20O5	363.124	365.138	FP Flavonoids	Flavone	Gauthier, 2015
186		Kaemferide 5-glucoside-7-glucuronide	C28H30O17	637.141	639.156	FP Flavonoids	Flavonol	Gauthier, 2015
191		Kaempferol 3-(2′′,3′′-diacetyl-4′′-p-coumaroyl rhamnoside)	C34H30O14	661.156	663.171	FP Flavonoids	Flavonol	Gauthier, 2015
192		Kaempferol 3-(6''-caffeoylglucoside)	C30H26O14	609.125	611.14	FP Flavonoids	Flavonol	Gauthier, 2015
194		Kaempferol 3-O-rhamnosyl glucoside 7-O-rhamnoside				FP Flavonoids	Flavonol
197		Kaempferol-3-isorhamnoside	C33H40O19	739.209	741.224	FP Flavonoids	Flavonol	Gauthier, 2015;
199		Kaempferol-3-rhamnoside-7-xylosyl-(1->2)-rhamnoside	C33H40O19	739.209	741.224	FP Flavonoids	Flavonol
202		Kaempferol-4′-methyl ether 3-neohesperioside	C28H32O15	607.167	609.181	FP Flavonoids	Flavonol
203		Kaempferol-7,4′-dirhamnoside	C27H30O14	577.156	579.171	FP Flavonoids	Flavonol	Gauthier, 2015;
204		Quercetin 3-(6′′-acetylglucoside)	C23H22O13	505.099	507.113	FP Flavonoids	Flavonol	Gauthier, 2015;
206	97142	Quercetin 5,7,3′,4′-tetramethyl ether	C19H18O7	357.098	359.113	FP Flavonoids	Flavonol	Gauthier, 2015;
207		Quercetin 7,3′,4′-trimethyl ether	C18H16O7	343.082	345.097	FP Flavonoids	Flavonol	Gauthier, 2015;
209		Quercetin/Quercetol	C15H10O7	301.034	303.05	FP Flavonoids	Flavonol	Gauthier, 2015;
213		Sappanone a trimethyl ether	C19H18O5	325.108	327.123	FP flavonoids	Isoflavanone	Gauthier, 2015;
224		4-Geranyloxy-5-methyl coumarin	C20H24O3	311.165	313.18	FP not flavonoids	Coumarin	Gauthier 2015
225		6,7-Dihydroxy-5-methoxycoumarin 6-beta-D-glucopyranoside	C16H18O10	369.083	371.097	FP not flavonoids	Coumarin	Gauthier 2015
227		Seselinol isovalerate	C19H20O5	327.124	329.138	FP not flavonoids	Coumarin	Bollina, 2010
228		trans-grandmarin isovalerate	C20H24O7	375.145	377.159	FP not flavonoids	Coumarin	Gauthier 2015
230		(+)-syringaresinol O β-D-glucoside	C28H36O13	579.208	581.223	FP not flavonoids	Lignan and stilbene	Gauthier 2015
232		3,4',5-Trihydroxystilbene 4'-O-beta-D-(6"-O-galloyl) glucopyranoside	C27H26O12	541.135	543.15	FP not flavonoids	Lignan and stilbene	Gauthier 2015
233		4'-Demethylpodophyllotoxin	C21H20O8	399.109	401.123	FP not flavonoids	Lignan and stilbene	Gauthier 2015
237		Bisosthenon	C28H24O8	487.14	489.154	FP not flavonoids	Lignan and stilbene	Gauthier 2015
239		Diphyllin	C21H16O7	379.082	381.097	FP not flavonoids	Lignan and stilbene	Gauthier 2015
240		Hydnocarpin	C25H20O9	463.103	465.118	FP not flavonoids	Lignan and stilbene	Gauthier 2015
242		Medioresinol 4'-O-beta-D glucopyranoside	C33H44O17	711.251	713.265	FP not flavonoids	Lignan and stilbene	Gauthier 2015
243		Oxyresveratrol 2-O-beta-glucopyranoside	C20H22O9	405.119	407.134	FP not flavonoids	Lignan and stilbene	Gauthier 2015
244		Phyllanthusmin B	C28H26O11	537.14	539.155	FP not flavonoids	Lignan and stilbene	Gauthier 2015
246		Secoisolariciresinol di- O- glucoside	C26H38O12	541.229	543.244	FP not flavonoids	Lignan and stilbene	Gauthier 2015
247		Threo-carolignan E	C40H42O13	729.255	731.27	FP not flavonoids	Lignan and stilbene	Gauthier 2015
248		Tuberculatin	C26H24O11	511.125	513.139	FP not flavonoids	Lignan and stilbene	Gauthier 2015
253		6′-O-(p-Coumaroyl)-procumbide	C24H28O12	507.151	509.165	FP not flavonoids	Phenolic Acid and derivatives	Gauthier 2015
264		Feruloyl-3-(arabinosylxylose)	C20H26O12	457.135	459.15	FP not flavonoids	Phenolic Acid and derivatives	Gauthier 2015
265		Methyl 6-O-p-trans-coumaroyl-β-D-glucopyranoside	C16H20O8	339.109	341.123	FP not flavonoids	Phenolic Acid and derivatives	Gauthier 2015
270		p-Coumaroylquinic acid	C16H18O8	337.093	339.107	FP not flavonoids	Phenolic Acid and derivatives	Gauthier 2015
272		Rosmarinic acid	C10H16O8	263.077	265.092	FP not flavonoids	Phenolic Acid and derivatives	Gauthier 2015
273		Salvianolic acid	C26H22O10	493.114	495.129	FP not flavonoids	Phenolic Acid and derivatives	Gauthier 2015
275		β-D-Glucopyranosyl-caffeic acid	C15H18O9	341.088	343.102	FP not flavonoids	Phenolic Acid and derivatives	Gauthier 2015
276		β-D-Glucopyranosyl-sinapic acid	C17H22O10	385.114	387.129	FP not flavonoids	Phenolic Acid and derivatives	Gauthier 2015
277		1-β-(3-Hydroxy-4,5-dimethoxyphenyl)-O-glucopyranoside	C14H20O9	331.103	333.118	FP not flavonoids	Phenolic Alcohol	Gauthier 2015
278		3,4-Dihydroxystyrene	C8H8O2	135.045	137.06	FP not flavonoids	Phenolic Alcohol	Gauthier 2015
280		Catechol	C6H6O2	109.029	111.044	FP not flavonoids	Phenolic Alcohol	Gauthier 2015
283		Dihydroconiferoyl alcohol	C10H14O3	181.087	183.102	FP not flavonoids	Phenolic Alcohol	Gauthier 2015
285		Guaiacol	C7H8O2	123.045	125.06	FP not flavonoids	Phenolic Alcohol	Gauthier 2015
286		p- Hydroxycinnamyl alcohol 4-D- glucoside	C15H20O7	311.114	313.128	FP not flavonoids	Phenolic Alcohol	Gauthier 2015
292		Caffeyl aldehyde	C9H8O3	163.04	165.055	FP not flavonoids	Phenolic Aldehyde	Gauthier 2015
297		2-Phenylethyl O-beta-D-xylopyranosyl-(1->2)-β-D-glucopyranoside	C19H28O10	415.161	417.176	FP not flavonoids		Bollina 2011
298		5,7,3',4'-Tetrahydroxy-6,8-di-C-prenylflavanone	C25H28O6	423.181	425.196	FP not flavonoids
300		Coumaroyl-seratonine	C19H18N2O3	321.124	323.139	FP not flavonoids		Mashietto 2015
301	nd	Coumoroyl-tryptamine	C19H20N2O	291.15	293.165	FP not flavonoids		Mashietto 2015
306	nd	Auriculatin 4'-O-glucoside	C31H34O11	581.203	583.217	Isoflavonoid		Bollina 2010
310	2733487	Fumonisin B1	C34H59NO15	720.38	722.396	Mycotoxins
311	2733489	Fumonisin B2	C34H59NO14	704.385	706.401	Mycotoxins
312	3034751	Fumonisin B3	C34H59NO14	704.385	706.401	Mycotoxins
314	6442086	Fusarin A	C23H29NO6	414.192	416.207	Mycotoxins
315	6435894	Fusarin C	C23H29NO7	430.187	432.202	Mycotoxins
316	nd	Fusarin D	C23H29NO7	430.187	432.202	Mycotoxins
380	6255	maltose	C12H22O11	341.109	343.123	Sugars
383	5460935	turanose	C12H22O11	341.109	343.123	Sugars
392	101863254	Briaexcavatin O	C33H44O13	647.271	649.285	Terpenoids	Diterpene	Gauthier, 2015
398	637125	trans-Communic acid	C20H30O2	301.217	303.232	Terpenoids	Diterpene	Gauthier, 2015
401	443322	7-Deoxyloganic acid	C16H24O9	359.135	361.149	Terpenoids	Iridoids and derivatives	Gauthier, 2015
408	161276	Secologanin	C17H24O10	387.13	389.144	Terpenoids	Iridoids and derivatives	Gauthier, 2015
411	4655876	Cryptomeridiol	C15H28O2	239.202	241.216	Terpenoids	Sesquiterpene	Gauthier, 2015
